# Supplementary material
Source: Springer Nature journal article supplement (https://www.springermedizin.de/resource/supplementary/12914_2008_53_MOESM1_ESM.pdf/9537410)

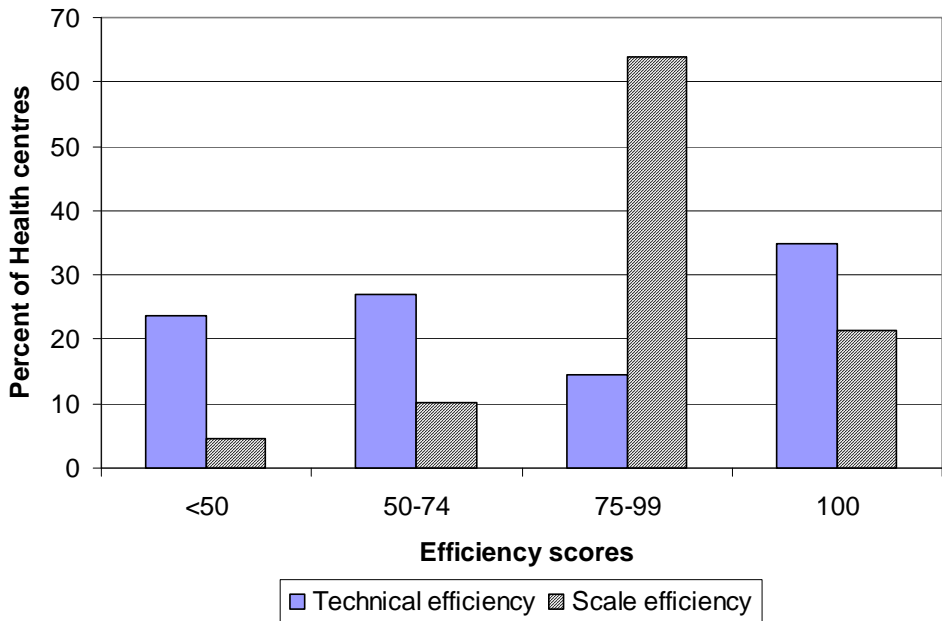

Supplement: MOESM1 [file 9537410]
